# Supplementary material for: Two-dimensional nanohybrid (RGS@AuNPs) as an effective catalyst for the reduction of 4-nitrophenol and photo-degradation of methylene blue dye
Source: Royal Society of Chemistry journal article supplement (doi:10.1039/c6nj04062d), 2017-01-01
Supplement: c6nj04062d1.pdf [file c6nj04062d1.pdf]

## Electronic Supplementary Information

### **Two-dimensional nanohybrid (RGS@AuNPs) as an effective catalyst for reduction of 4-nitrophenol and photo-degradation of methylene blue dye**

*Swarup Kumar Maji, \*,<sup>a</sup> Avijit Jana<sup>b,c,d</sup>*

<sup>a</sup> Department of Chemistry, Khatra Adibasi Mahavidyalaya, Khatra 722140, West Bengal, India. Email: [maji\\_swarup@yahoo.in](mailto:maji_swarup@yahoo.in)

<sup>b</sup> Biomaterials group, <sup>c</sup> Division of Natural Product Chemistry, <sup>d</sup> Academy of Scientific & Innovative Research (AcSIR), CSIR-Indian Institute of Chemical Technology, Hyderabad.

## **General measurements**

Transmission electron microscopy (TEM) analyses were performed on a FEG-TEM (JEM-2100F, JEOL, Japan) operated at 200 kV. X-ray photon spectroscopy (XPS) analyses were carried out by SPECS HSA3500 plus spectrometer using Mg X-ray source. Energy dispersive X-ray spectrum (EDS) was collected using a HITACHI S-4500 instrument. Nitrogen sorption measurements were carried out by Brunauer–Emmett–Teller (BET) technique using a Micromeritics ASAP 2020M automated sorption analyzer at 77K. Electronic absorption spectra were recorded on a Shimadzu UV-3101 PC NIR scanning spectrophotometer. Liquid chromatography mass spectrometry (LCMS) measurements were conducted on a Waters Q-tof Premier MS.

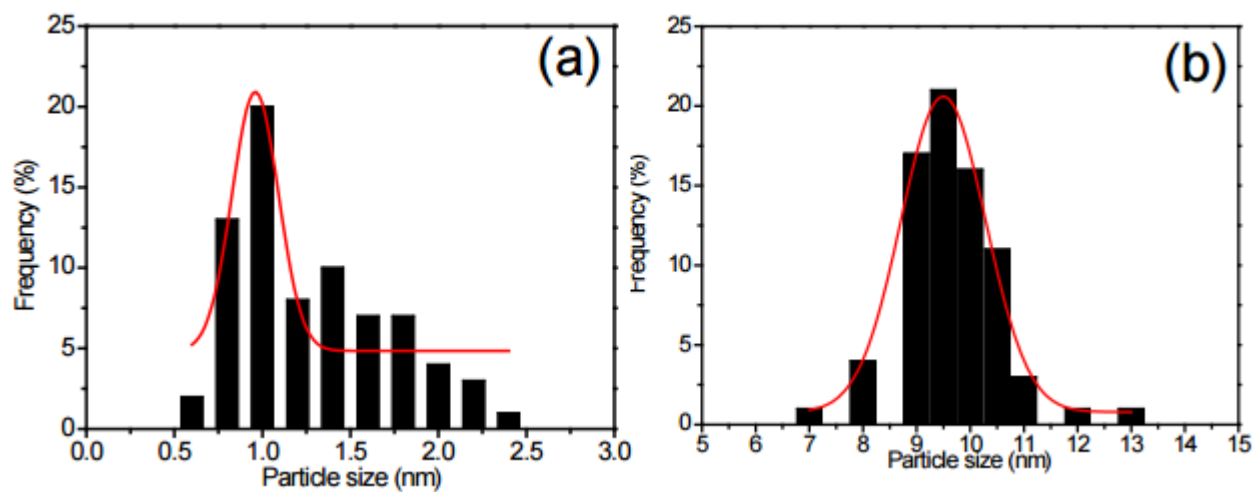

**Fig. S1.** Average size distribution plots for (a) RGS@PMS and (b) Au NPs deposited on RGS@PMS.

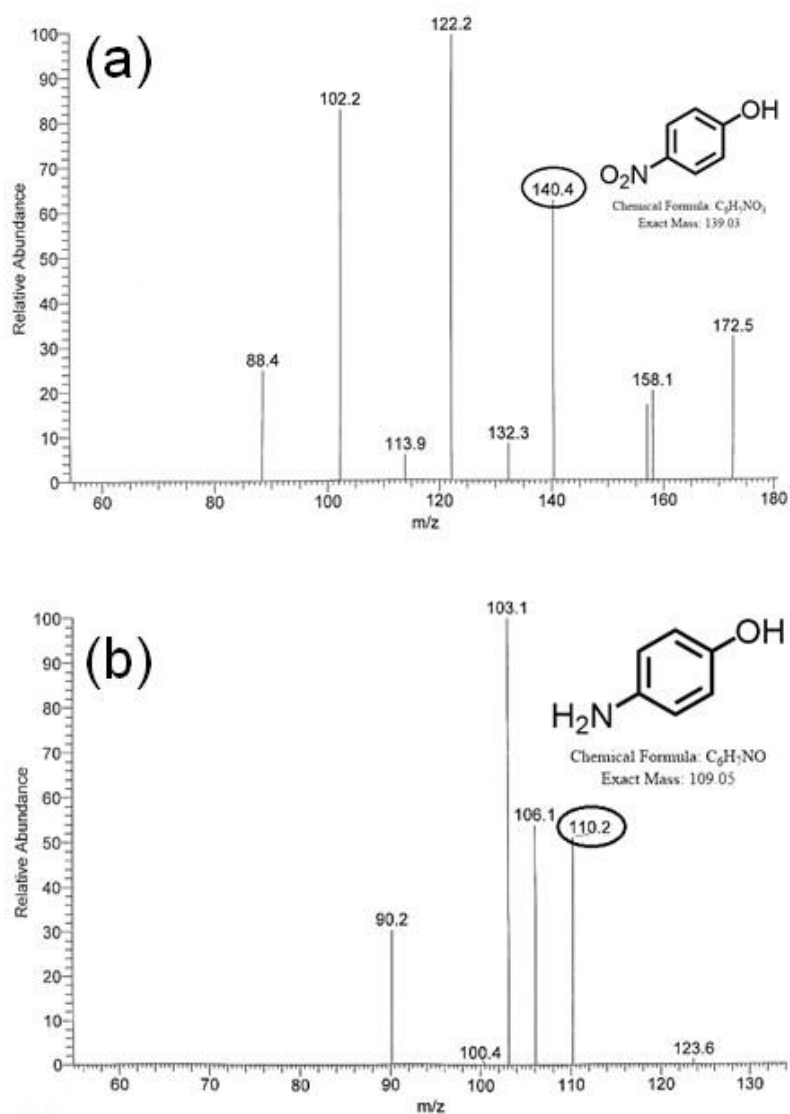

**Fig. S2.** LCMS of (a) 4-NP before reaction and (b) the converted 4-AP after reduction reaction.

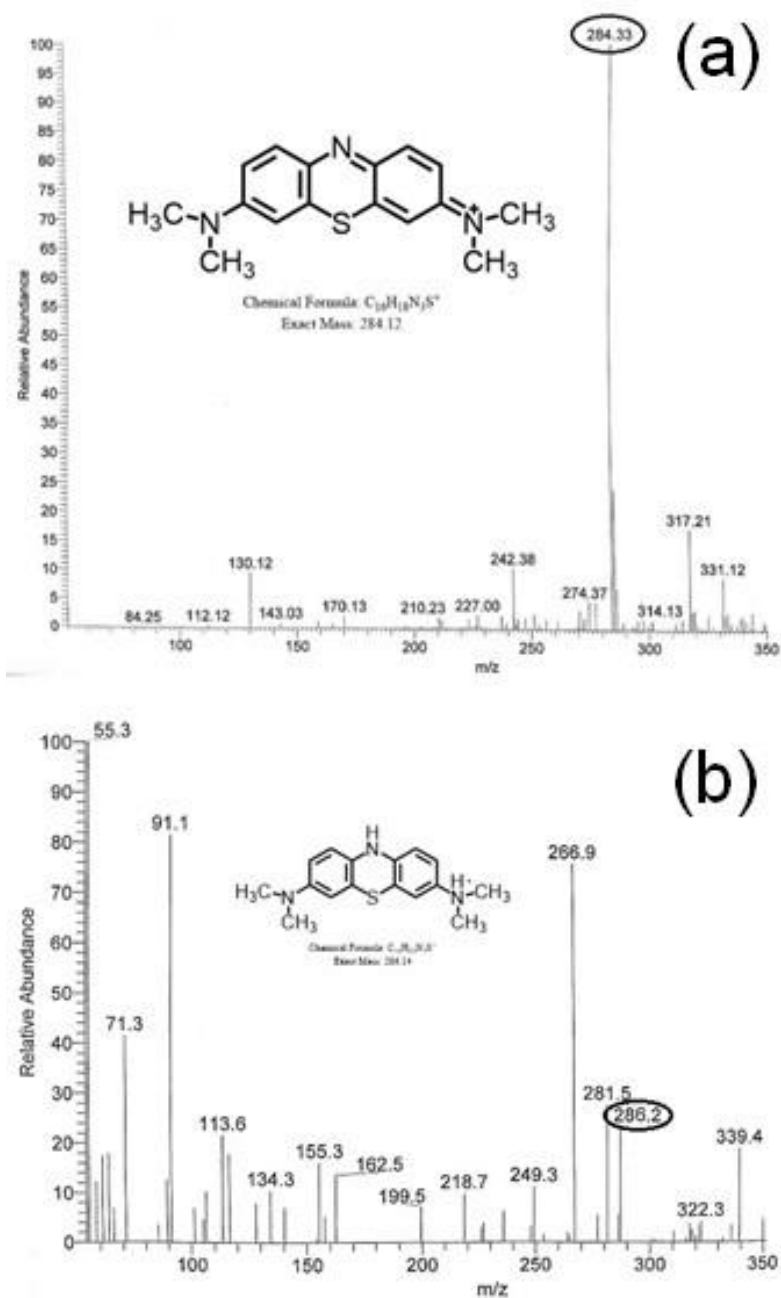

**Fig. S3.** LCMS of MB solution (a) before reaction and (b) after the reduction with  $NABH_4$  in the presence of RGS@AuNPs.

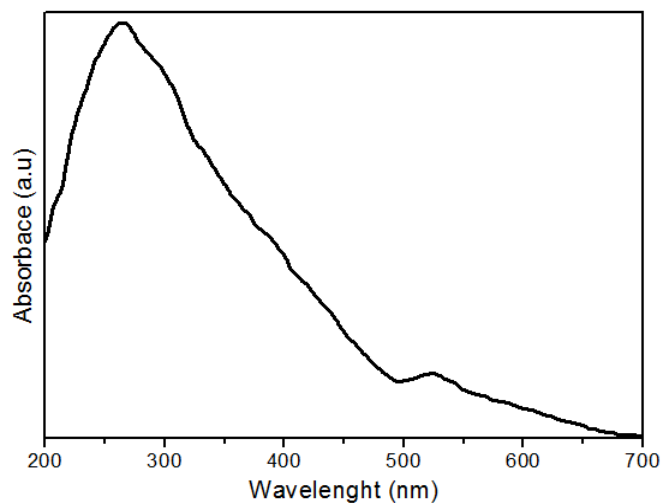

**Fig. S4.** UV-vis absorbance spectrum of RGS@AuNPs.
